# Supplementary material
Source: Springer Nature journal article supplement (https://www.springermedizin.de/resource/supplementary/12884_2013_995_MOESM7_ESM.pdf/9458708)

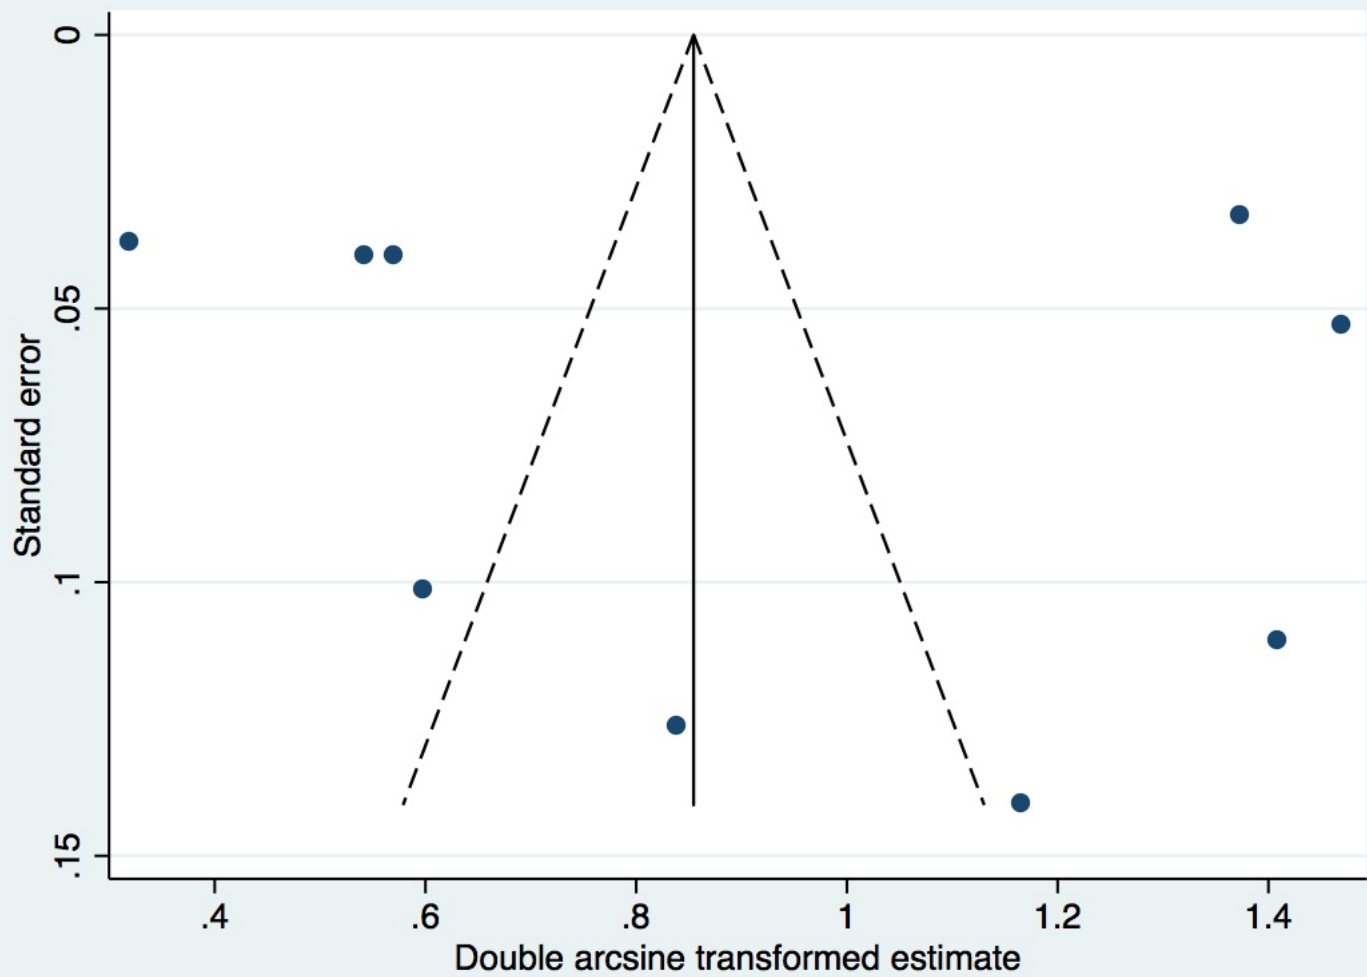

Supplement: MOESM7 [file 9458708]
